# Supplementary material for: Allyl Isothiocianate Induces Ca2+ Signals and Nitric Oxide Release by Inducing Reactive Oxygen Species Production in the Human Cerebrovascular Endothelial Cell Line hCMEC/D3
Source: MDPI journal article supplement (doi:10.3390/cells12131732), 2023-06-27
Supplement: s1 [file s1]

## Supplementary Figures

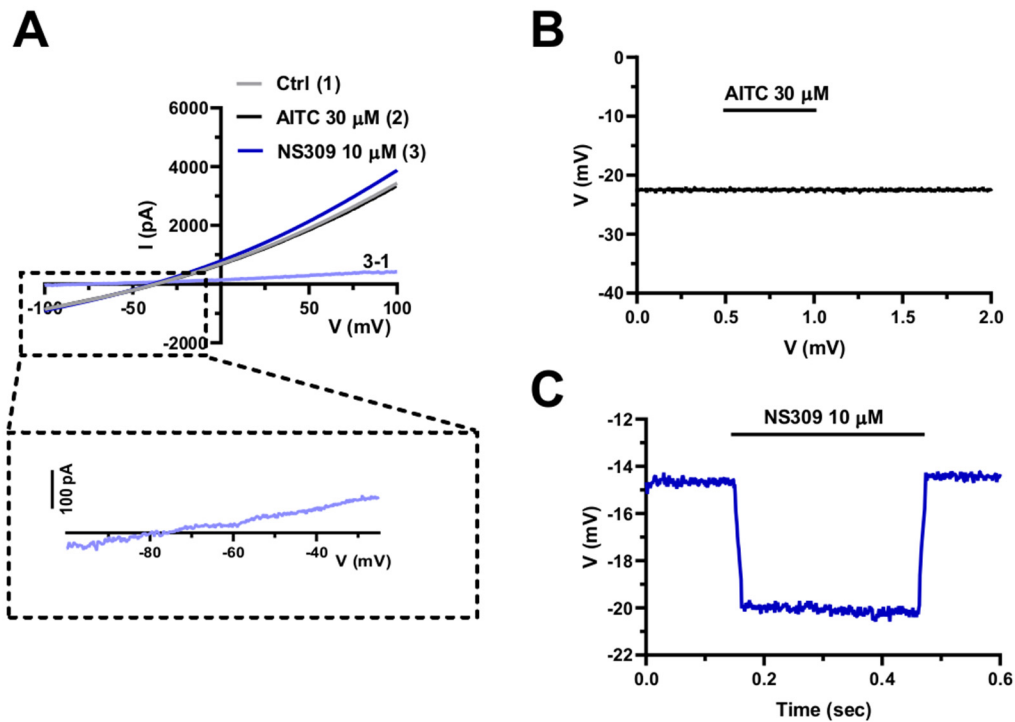

**Figure S1. AITC does not induce bioelectrical signals in hCMEC/D3 cells.** A, planar whole-cell patch-clamp recordings showed that AITC (30  $\mu$ M) failed to activate transmembrane currents, while NS309 (10  $\mu$ M), a selective opener of SK<sub>Ca</sub>/IK<sub>Ca</sub> channels, evoked an outwardly-rectifying K<sup>+</sup> current that reversed at around -70 mV, as shown in the inset. B, current-clamp recordings confirmed that AITC (30  $\mu$ M) did not change the resting membrane potential, which ranges between -50 mV and -10 mV, as reported in other endothelial cell types (Moccia et al., 2002). C, NS309 (10  $\mu$ M) induced a rapid and reversible membrane hyperpolarization, as predicted by the opening of SK<sub>Ca</sub>/IK<sub>Ca</sub> channels.

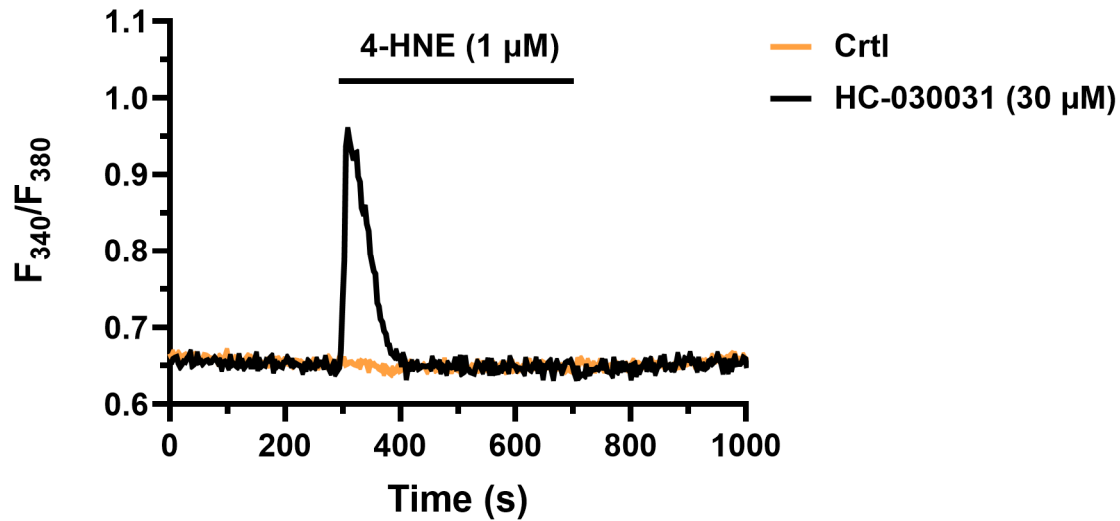

**Figure S2. 4-HNE evokes TRPA1-mediated  $\text{Ca}^{2+}$  signals in hCMEC/D3 cells.** 4-HNE (1  $\mu$ M), a selective TRPA1 agonist, evoked a rapid increase in  $[\text{Ca}^{2+}]_i$  in hCMEC/D3 cells ( $n=73$  from three independent experiments). Conversely, 4-HNE failed to induce any detectable  $\text{Ca}^{2+}$  signal in the presence of HC-030031 (30  $\mu$ M) ( $n=45$  from three independent experiments).

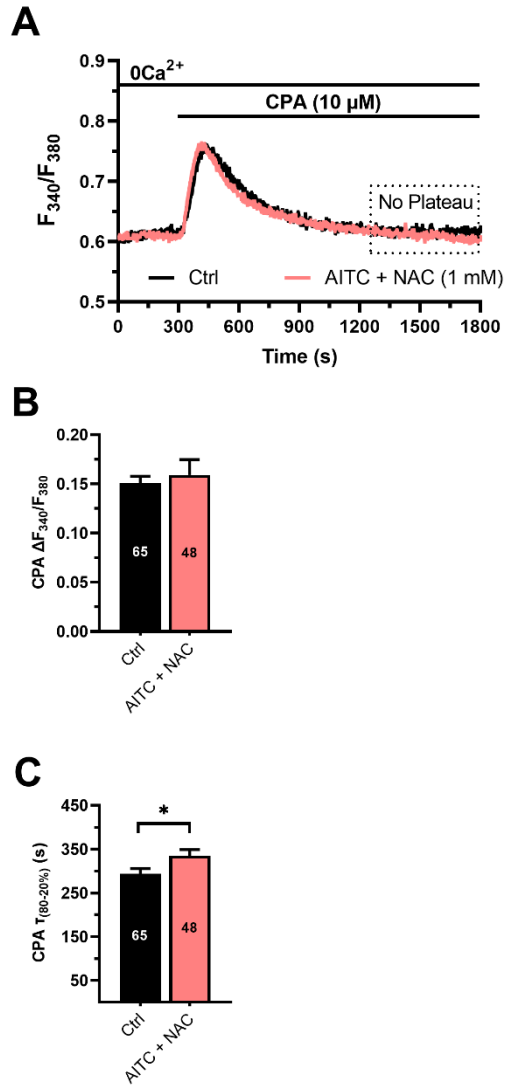

**Figure S3. NAC prevents AITC effect on CPA-evoked Ca<sup>2+</sup> release in hCMEC/D3 cells.** A, pretreating hCMEC/D3 cells with the antioxidant NAC (1 mM) prevents AITC (30 μM) from converting CPA-evoked transient Ca<sup>2+</sup> release into a long-lasting elevation in [Ca<sup>2+</sup>]<sub>i</sub>, presenting a discernible Ca<sup>2+</sup> plateau. CPA was administered at 10 μM. Ctrl: control. B, mean±SE of the amplitude of CPA-evoked ER Ca<sup>2+</sup> release in the absence (Ctrl) and presence of AITC+NAC. NS: not significant, Student's *t*-test. C, mean±SE of τ<sub>80-20</sub> of CPA-evoked ER Ca<sup>2+</sup> release in the absence (Ctrl) and presence of AITC+NAC. Student's *t*-test: \* *p* < 0.05.

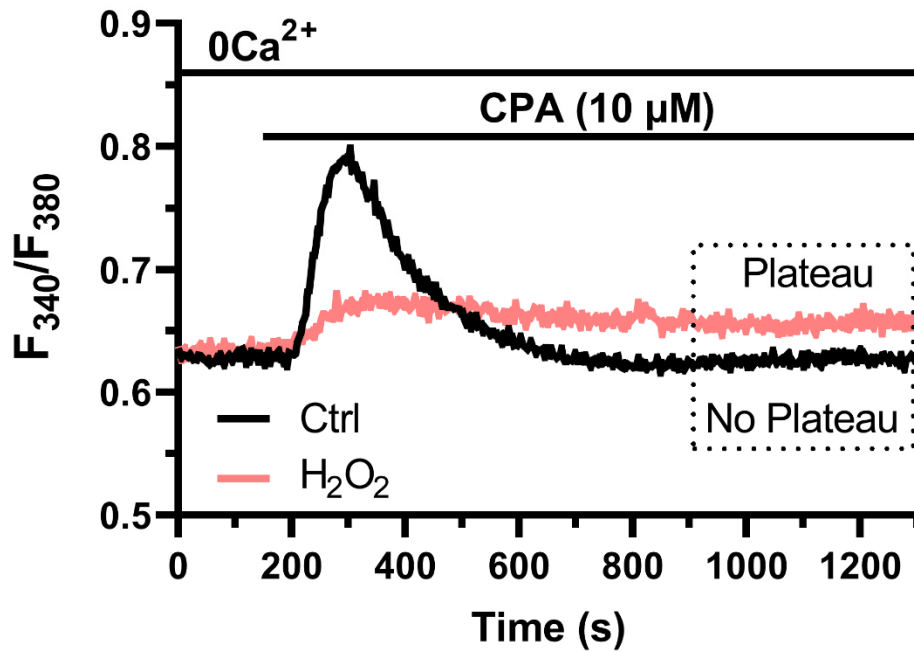

**Figure S4. H<sub>2</sub>O<sub>2</sub> prevents the decay to the baseline of CPA-evoked Ca<sup>2+</sup> release.** A, pretreating hCMEC/D3 cells with H<sub>2</sub>O<sub>2</sub> (100 μM) reduces the amplitude of CPA-induced ER Ca<sup>2+</sup> release from  $0.1533 \pm 0.00702$  a.u. (n=42) measured under control (Ctrl) conditions to  $0.06147 \pm 0.004823$  a.u. (n=42) (H<sub>2</sub>O<sub>2</sub>) (Student's *t*-test: \*\*\*\* *p* < 0.0001). The reduction in the peak amplitude of CPA-induced ER Ca<sup>2+</sup> release is due to the reduction in the driving-force promoting intraluminal Ca<sup>2+</sup> efflux because of the previous Ca<sup>2+</sup> response to H<sub>2</sub>O<sub>2</sub> (not shown). Nevertheless, in the presence of H<sub>2</sub>O<sub>2</sub>, the rise in [Ca<sup>2+</sup>]<sub>i</sub> induced by CPA failed to decay to the baseline, resulting in a long-lasting plateau phase ( $0.01584 \pm 0.003552$  a.u., n=42). The baseline of the Ca<sup>2+</sup> tracings shown in the Figure have been overlapped for representative purposes.

## Reference

Moccia, F., Berra-Romani, R., Baruffi, S., Spaggiari, S., Adams, D.J., Taglietti, V., et al. (2002). Basal nonselective cation permeability in rat cardiac microvascular endothelial cells. *Microvasc Res* 64(2), 187-197.
